# Supplementary material
Source: ML conference proceedings conference paper supplement (https://proceedings.neurips.cc/paper_files/paper/2022/hash/45fc4a0da7e7f6fbabaabe2d20a441d1-Abstract.html)
Supplement: Supplementary file 1 [file 45fc4a0da7e7f6fbabaabe2d20a441d1-Supplemental-Conference.zip]

Archive with 5 entries (4 files):
- supp/
- supp/full_paper_with_appendix.pdf
- __MACOSX/supp/._full_paper_with_appendix.pdf
- supp/Correlation.ipynb
- __MACOSX/supp/._Correlation.ipynb
