# Supplementary material
Source: ML conference proceedings conference paper supplement (https://proceedings.neurips.cc/paper_files/paper/2022/hash/45fc4a0da7e7f6fbabaabe2d20a441d1-Abstract.html)
Supplement: Supplementary file 1 [file 45fc4a0da7e7f6fbabaabe2d20a441d1-Supplemental-Conference.zip › supp/Correlation.ipynb]

# %% [markdown]
# Simulate ReLU-Like and $C^4$ Activations 

For sigmoid $\sigma(x) = \frac{1}{1 - e^{-x}}$, 
but we will shape it to have $\varphi(0) = 0, \varphi'(0) = 1$ by defining 

$$ \varphi(x) = 4 \sigma(x) - 2 \,. 
$$

We will introduce the parameter $s = a n^p$ so that we have 

$$ \varphi_s(x) = s \varphi\left( \frac{x}{s} \right) \,. 
$$

# %% [code]
import shelve

filename='/tmp/shelve.out'
my_shelf = shelve.open(filename,'n') # 'n' for new

for key in dir():
    if key[:2] == 'df' or key[:4] == 'dict':
        try:
            my_shelf[key] = globals()[key]
        except TypeError:
            #
            # __builtins__, my_shelf, and imported modules can not be shelved.
            #
            print('ERROR shelving: {0}'.format(key))
my_shelf.close()

# %% [code]
#to restore session:
import shelve
filename='/tmp/shelve.out'
my_shelf = shelve.open(filename)
for key in my_shelf:
    globals()[key]=my_shelf[key]
my_shelf.close()

# %% [code]
import jax.numpy as jnp
from jax import grad, jit, vmap
from jax import random
from jax import nn
import time
import math
import numpy as np 
# from google.colab import files, drive, output
from sklearn.linear_model import LinearRegression
import pandas as pd 
from plotnine import * 
import datetime as dt
import pytz
from IPython.display import clear_output

import matplotlib as mpl
# mpl.rc('text', usetex=True) # for plotting latex
# mpl.rc('text.latex', preamble=r'\usepackage{amssymb}')
# # mpl.verbose.level = 'debug-annoying'

# from mizani.formatters import scientific_format # for plotting axis 

from sympy import *

def norm2(y):
    return jnp.einsum("is,is->s",y,y)

def norm(y):
    return jnp.sqrt(norm2(y))

def norm_1d(y):
    return jnp.sqrt(jnp.einsum('i,i',y,y))

# %% [code]
# calculate the normalizing constant 
from scipy import integrate

def calc_c(s, vps, print_results = False):
    h = lambda x: vps(x)**2 * 1/np.sqrt(2*np.pi) * np.exp(-x**2/2) 
    quad_result = integrate.quadrature(h, -10, 10)
    
    if print_results:
        print(quad_result)

    c = 1 / quad_result[0]
    return c


def calc_mean_sd_z(z_a, z_b): 
    M_a = c / n * norm2(vps(z_a))
    M_b = c / n * norm2(vps(z_b))
    V_ab = c / n * jnp.einsum( "is, is -> s", vps(z_a), vps(z_b) )
    rho = V_ab / jnp.sqrt( M_a * M_b ) 
    return np.mean(rho.copy()), np.std(rho.copy())

def calc_quantile_z(z_a, z_b, vps, quantiles=[0.25, 0.5, 0.75]): 
    M_a = norm2(vps(z_a))
    M_b = norm2(vps(z_b))
    V_ab = jnp.einsum( "is, is -> s", vps(z_a), vps(z_b) )
    rho = V_ab / jnp.sqrt( M_a * M_b ) 
    rho = rho.copy() 

    qs = np.asarray([np.quantile(rho, q) for q in quantiles]) 
    return qs

def calc_path_summary(z_a, z_b, vps, cn, return_paths):
    M_a = cn**2 * norm2(vps(z_a))
    M_b = cn**2 * norm2(vps(z_b))
    V_ab = cn**2 * jnp.einsum( "is, is -> s", vps(z_a), vps(z_b) )
#     rho = V_ab / jnp.sqrt( M_a * M_b ) 

    M_a0 = M_a[0:return_paths].copy().reshape((-1,1))
    M_b0 = M_b[0:return_paths].copy().reshape((-1,1))
    V_ab0 = V_ab[0:return_paths].copy().reshape((-1,1))
    
    return np.concatenate((M_a0, M_b0, V_ab0), axis=1).T

# %% [code]
def simulate_network(n=100, d=100, S0=2**10, n_in=5, a=1, p=1/2, cp=0, cm=-1, 
                     rho=0.3, activation='relu', 
                     key=random.PRNGKey(int(time.time())), 
                     quantiles=[0.25,0.5,0.75], 
                     return_paths=0 ):
    
    if activation == 'relu':
        # relu shaping
        sp = 1 + cp / n**p
        sm = 1 + cm / n**p
        vp = lambda x: nn.relu(x)
        vps = lambda x: sp * vp(x) - sm * vp(-x) 
        c = 2 / ( sp**2 + sm**2 ) 
    
    elif activation == 'softplus':
        s = a * n**p 
        vp = lambda x: 2 * ( nn.softplus(x) - np.log(2) ) 
        vps = lambda x: s * vp(x/s) 
        c = calc_c(s, vps)
        
    elif activation == 'softplus_log2':
        s = a * n**p 
        vp = lambda x: 3/2 * ( nn.softplus(x + jnp.log(2) ) - jnp.log(3) ) 
        vps = lambda x: s * vp(x/s) 
        c = calc_c(s, vps)

    else: # activation == 'sigmoid':
        # smooth shaping 
        s = a * n**p 
        vp = lambda x: 4 * nn.sigmoid(x) - 2 
        vps = lambda x: s * vp(x/s) 
        c = calc_c(s, vps)
    
    # constant multiple per layer 
    cn = jnp.sqrt(c/n) 

    # rng split 
    key_array0 = random.split(key, num=5)
    key_array = random.split(key_array0[2], num=d)

    # inputs 
    x_a = jnp.asarray([1,0,0,0,0])
    x_a = x_a / norm_1d(x_a)

    x_b = jnp.asarray([rho,jnp.sqrt(1 - rho**2),0,0,0])
    x_b = x_b / norm_1d(x_b) 

    # x_c = jnp.asarray([rho13, q13 * jnp.cos(t23), q13 * jnp.sin(t23),0,0])
    # x_c = x_c / norm_1d(x_c) 

    W0 = random.normal(key_array[0], (n, n_in, S0), dtype=jnp.float64)

    z_a = jnp.einsum('ijs,j->is', W0, x_a) * jnp.sqrt(c / n_in) 
    z_b = jnp.einsum('ijs,j->is', W0, x_b) * jnp.sqrt(c / n_in) 
    # z_c = jnp.einsum('ijs,j->is', W0, x_c) * jnp.sqrt(c / n_in) 

    quantile_array = np.zeros((d+1, len(quantiles)))
    quantile_array[0,:] = calc_quantile_z(z_a, z_b, vps, quantiles)
    
    if return_paths > 0:
        path_array = np.zeros((d+1, 3, return_paths))
        path_array[0,:,:] = calc_path_summary(z_a, z_b, vps, cn, return_paths)

    for l in range(1,d+1):
        W = random.normal(key_array[l],(n, n, S0), dtype=jnp.float64)

        # shifted and leaky ReLU
        z_a = cn * jnp.einsum("ijs,js->is",W[:,:,:], vps(z_a) )
        z_b = cn * jnp.einsum("ijs,js->is",W[:,:,:], vps(z_b) )
    #     z_c = cn * jnp.einsum("ijs,js->is",W[:,:,:], vps(z_c) )

        quantile_array[l,:] = calc_quantile_z(z_a, z_b, vps, quantiles)
        if return_paths > 0:
            path_array[l,:,:] = calc_path_summary(z_a, z_b, vps, cn, return_paths)

        del(W)

    # calculate norms 
    M_a = c / n * norm2(vps(z_a))
    M_b = c / n * norm2(vps(z_b))
    V_ab = c / n * jnp.einsum( "is, is -> s", vps(z_a), vps(z_b) )

    if return_paths > 0: 
        return M_a.copy(), M_b.copy(), V_ab.copy(), quantile_array, path_array

    else: 
        return M_a.copy(), M_b.copy(), V_ab.copy(), quantile_array

# %% [markdown]
# Simulate the Joint SDEs 

$$
d \begin{bmatrix}
		M^\alpha_t \\ M^\beta_t \\ V^{\alpha\beta}_t 
	\end{bmatrix}
	% 
	= 
	\frac{1}{a^2}
	\begin{bmatrix}
		\left( \frac{3}{4} \varphi''(0)^2 + \varphi'''(0) \right) 
		M^\alpha_t (M^\alpha_t - 1) \\ 
		% 
		\left( \frac{3}{4} \varphi''(0)^2 + \varphi'''(0) \right) 
		M^\beta_t (M^\beta_t - 1) \\ 
		% 
		\frac{\varphi''(0)^2}{4} 
		\left( M^\alpha_t M^\beta_t + 2 (V^{\alpha\beta}_t)^2 
			- 3 V^{\alpha\beta}_t \right) 
		+ \frac{\varphi'''(0)}{2} ( M^\alpha_t + M^\beta_t - 2 ) 
		V^{\alpha\beta}_t 
	\end{bmatrix} 
	\, dt 
	+ 
	\Sigma( M^\alpha_t, M^\beta_t, V^{\alpha\beta}_t )^{1/2} 
	% 
	\, dB_t \,, 
$$

where 

$$
\Sigma(M^\alpha, M^\beta, V) = \begin{bmatrix}
		2 (M^\alpha)^2 
		& 2 V^2  
		& 2 M^\alpha V \\ 
		% 
		2 V^2  
		& 2 (M^\beta)^2 
		& 2 M^\beta V \\ 
		% 
		2 M^\alpha V 
		& 2 M^\beta V 
		& M^\alpha M^\beta + V^2 
	\end{bmatrix} \,. 
$$

# %% [code]
from numpy.linalg.linalg import cholesky
import numpy as np
import numpy.random as rd 

def nu(rho,cp,cm): 
    return (cp-cm)**2 / (2*np.pi) * ( np.sqrt(1-rho**2) - rho*np.arccos(rho) )

def calc_drift_relu(p_t,cp,cm): 
    Ma = p_t[0,:] 
    Mb = p_t[1,:] 
    V = p_t[2,:] 
    rho = V / np.sqrt(Ma * Mb)

    return nu(rho,cp,cm) * np.sqrt(Ma * Mb) 

def calc_drift(p_t,a,vpd2,vpd3): 
    Ma = p_t[0,:] 
    Mb = p_t[1,:] 
    V = p_t[2,:] 

    b = 1 / a**2 * ( 3/4*vpd2**2 + vpd3 ) 

    drift_vec = np.zeros(p_t.shape)
    drift_vec[0,:] = b / a**2 * Ma * (Ma - 1) 
    drift_vec[1,:] = b / a**2 * Mb * (Mb - 1) 
    drift_vec[2,:] = 1/ a**2 * ( vpd2**2/4 * (Ma * Mb + 2 * V**2 - 3 * V) + 
                                vpd3/2 * (Ma + Mb - 2) * V )
    return drift_vec

def calc_cov_matrix(p_t,S0):
    Ma = p_t[0,:] 
    Mb = p_t[1,:] 
    V = p_t[2,:] 

    # S0 = Ma.shape[0] 
    cov_mat = np.zeros((3,3,S0)) 
    
    cov_mat[0,0,:] = 2 * Ma**2 
    cov_mat[0,1,:] = 2 * V**2 
    cov_mat[0,2,:] = 2 * Ma * V 
    
    cov_mat[1,0,:] = 2 * V**2 
    cov_mat[1,1,:] = 2 * Mb**2 
    cov_mat[1,2,:] = 2 * Mb * V 

    cov_mat[2,0,:] = 2 * Ma * V 
    cov_mat[2,1,:] = 2 * Mb * V 
    cov_mat[2,2,:] = Ma * Mb + V**2 

    return cov_mat 

def cholesky_mat(cov_mat,S0):
    # S0 = cov_mat.shape[2]
    L = np.zeros((3,3,S0))
    for i in range(S0): 
        L[:,:,i] = np.linalg.cholesky(cov_mat[:,:,i])
    return L 

def calc_diffusion(p_t,S0):
    cov_mat = calc_cov_matrix(p_t,S0)
    L = cholesky_mat(cov_mat,S0)

    g = rd.normal(size = p_t.shape)
    gc = np.einsum("ijs,js->is", L, g)
    return gc

def calc_mean_sd_sde(p_t): 
    Ma = p_t[0,:] 
    Mb = p_t[1,:] 
    V = p_t[2,:] 
    rho = V / np.sqrt(Ma * Mb)
    return np.mean(rho), np.std(rho) 

def calc_quantile_sde(p_t, quantiles = [0.25, 0.5, 0.75]): 
    Ma = p_t[0,:] 
    Mb = p_t[1,:] 
    V = p_t[2,:] 
    rho = V / np.sqrt(Ma * Mb)
    qs = np.asarray([np.quantile(rho, q) for q in quantiles])
    return qs

def simulate_sde(n=100, d=100, S0=2**10, n_in=5, a=1, cp=0, cm=-1, 
                Nt = 100, rho=0.3, activation='relu', 
                x_in_norm = 1, 
                quantiles=[0.25,0.5,0.75] ):

    T = (d+1)/n 
    # Nt = int(T / dt)
    dt = T/Nt

    if activation == 'softplus':
        vpd2 = 1/2 
        vpd3 = 0
        
    elif activation == 'softplus_log2': 
        vpd2 = 1/3 
        vpd3 = -1/9 
        
    else: # sigmoid derivatives  
        vpd2 = 0
        vpd3 = -1/2 
        # b = 1 / a**2 * ( 3/4*vpd2**2 + vpd3 ) 

    p_t = np.zeros((3, S0))
    p_t[0,:] = x_in_norm / n_in 
    p_t[1,:] = x_in_norm / n_in 
    p_t[2,:] = rho * np.sqrt(p_t[0,:] * p_t[1,:]) 

    sde_quantile_array = np.zeros( (Nt,len(quantiles)) )
    sde_quantile_array[0,:] = calc_quantile_sde(p_t,quantiles)

    for i in range(Nt):
        if activation == 'relu':
            p_t = p_t + calc_drift_relu(p_t,cp,cm) * dt + \
                    calc_diffusion(p_t,S0) * np.sqrt(dt) 
        else: # activation == 'sigmoid' or 'softplus' 
            p_t = p_t + calc_drift(p_t,a,vpd2,vpd3) * dt + \
                    calc_diffusion(p_t,S0) * np.sqrt(dt) 

        sde_quantile_array[i,:] = calc_quantile_sde(p_t,quantiles)
    
    return p_t, sde_quantile_array


# %% [markdown]
# Density Plots for ReLU Activation

# %% [code]
S0 = 2**13
n = 150
rho0 = 0.3

# NN 
start_time = time.time()
M_a, M_b, V_ab, quantile_array = simulate_network(n=n, d=n, S0 = S0, rho = rho0)

end_time = time.time()
print('Time Elapsed:', round(end_time - start_time,1), 'seconds.')

# SDE
start_time = time.time() 
p_t, sde_quantile_array = simulate_sde(Nt = n, S0 = S0, rho = rho0) 

end_time = time.time()
print('Time Elapsed:', round(end_time - start_time,1), 'seconds.')

# %% [code]
rho0 = 0.3
cp = 0 
cm = -1
Nt = n
T = 1
dt = T/Nt

t_vec = np.linspace(0,T,Nt+1)
rho_vec = np.zeros((Nt+1,))
rho_vec[0] = rho0

for i in range(Nt):
    rho_vec[i+1] = rho_vec[i] + nu(rho_vec[i],cp,cm) * dt 

df_inf_wid_path = pd.DataFrame( {'t':t_vec, 'rho': rho_vec} ) 

# ggplot(df_inf_wid_path, aes(x='t', y='rho')) + geom_line() 

# %% [code]
Ma = p_t[0,:] 
Mb = p_t[1,:] 
V = p_t[2,:] 

rho = V / np.sqrt(Ma * Mb)
rho_nn = V_ab / jnp.sqrt(M_a * M_b)

df = pd.DataFrame( {'V': V, 'rho': rho, 'variable': 'SDE (Ours)'} )
df2 = pd.DataFrame( {'V': V_ab.copy(), 'rho': rho_nn.copy(), 'variable': 'NN'} )
df_relu_corr_samples = pd.concat([df,df2])

df_relu_corr_samples['Fisher'] = np.arctanh(df_relu_corr_samples['rho'])

ggplot(df_relu_corr_samples, aes(x = 'rho', color = 'variable') ) + stat_ecdf() + \
    scale_color_manual( values = ['#e41a1c', '#377eb8'], 
                       breaks = ['SDE (Ours)', 'NN'] ) 

# %% [code]
# fontsize = 25 
# textsize = 30

# infinite width 
rho_inf_wid = np.asarray(df_inf_wid_path.rho)[-1]
df_rho_inf_wid_vert = pd.DataFrame( {'rho': [rho_inf_wid], 'variable': ['Infinite Width']} )

from sklearn.neighbors import KernelDensity
rho = np.asarray(df_relu_corr_samples.loc[df_relu_corr_samples['variable'] == 'SDE (Ours)','rho'])
X = np.arctanh(rho).reshape((-1,1))
kde = KernelDensity(kernel='gaussian', bandwidth=0.2).fit(X)

x_vec = np.linspace(-5,5,100)
rho_vec = np.tanh(x_vec)
# rho_vec = np.linspace(-0.99,0.9999,100)
# x_vec = np.arctanh(rho_vec)

jac_vec = 1 / (1 - rho_vec**2) 

log_dens = kde.score_samples(x_vec.reshape((-1,1)))
dens_rho = np.exp( log_dens + np.log(jac_vec) )

# df_density = pd.DataFrame({ 'x': x_vec, 'kde': np.exp(log_dens)})
df_density = pd.DataFrame({ 'rho': rho_vec, 'kde': dens_rho, 'x': x_vec, 'x_density': np.exp(log_dens), 
                           'variable': 'SDE (Ours)'})
plt_density = ggplot(df_density, aes(x = 'rho', y = 'kde', color = 'variable')) + \
        geom_histogram(data = df_relu_corr_samples[df_relu_corr_samples['variable']=='NN'], \
                        mapping = aes(x = 'rho', y = '..density..', fill = 'variable'), 
                        alpha = 0.7, position = 'identity', 
                        bins = 100, color = None) + \
        geom_line( size = 1.5 ) + \
        geom_vline(data = df_rho_inf_wid_vert, mapping = aes(xintercept = 'rho', linetype = 'variable'), 
                   size = 1.5, color = '#33a02c' ) + \
        scale_color_manual( values = ['#e41a1c'], 
                       limits = ['SDE (Ours)'] ) + \
        scale_linetype_manual( values = ['dashed'], 
                       limits = ['Infinite Width'] ) + \
        scale_fill_manual( values = ['grey'] ) + \
        labs(
            x ="Correlation $\\rho^{\\alpha\\beta}_d$", y = "Density", 
            color = '', fill = '', linetype = '') + \
        theme( legend_position = 'bottom', 
              legend_box_spacing = 0.3, legend_box = 'horizontal', 
              legend_background = element_rect(alpha = 0), 
              text = element_text(size = 16) ) 
print(plt_density)
plt_density.save(filename = 'rho_density.pdf', path = 'Figures/' )

# figure_size = (16,4), legend_position = 'bottom', 
#               legend_box_spacing = 0.3, legend_box = 'horizontal', 

# plt_density_fisher = ggplot(df_density, aes(x = 'x', y = 'x_density', color = 'variable')) + \
#         geom_line() + \
#         geom_histogram(data = df_relu_corr_samples[df_relu_corr_samples['variable']=='NN'], \
#                         mapping = aes(x = 'Fisher', y = '..density..', fill = 'variable'), 
#                         alpha = 0.7, position = 'identity', 
#                         bins = 100, color = None) + \
#         scale_color_manual( values = ['#e41a1c', '#377eb8'], 
#                        breaks = ['SDE', 'NN'] ) + \
#         scale_fill_manual( values = ['grey'] )
# print(plt_density_fisher)

# %% [code]
# fontsize = 25 
# textsize = 30

# infinite width 
rho_inf_wid = np.asarray(df_inf_wid_path.rho)[-1]
df_rho_inf_wid_vert = pd.DataFrame( {'V':[rho_inf_wid / 5], 'rho': [rho_inf_wid], 'variable': ['Infinite Width']} )

from sklearn.neighbors import KernelDensity
cov = np.asarray(df_relu_corr_samples.loc[df_relu_corr_samples['variable'] == 'SDE (Ours)','V'])
# X = np.arctanh(rho).reshape((-1,1))
X = cov.reshape((-1,1))
kde = KernelDensity(kernel='gaussian', bandwidth=0.005).fit(X)

x_vec = np.linspace(-0.5,0.5,100)
# rho_vec = np.tanh(x_vec)
# rho_vec = np.linspace(-0.99,0.9999,100)
# x_vec = np.arctanh(rho_vec)

# jac_vec = 1 / (1 - rho_vec**2) 

log_dens = kde.score_samples(x_vec.reshape((-1,1)))
# dens_rho = np.exp( log_dens + np.log(jac_vec) )
dens_V = np.exp( log_dens )

# df_density = pd.DataFrame({ 'x': x_vec, 'kde': np.exp(log_dens)})
df_relu_cov_density = pd.DataFrame({ 'V': x_vec, 'kde': dens_V, 'variable': 'SDE (Ours)'})

plt_relu_cov_density = ggplot(df_relu_cov_density, aes(x = 'V', y = 'kde', color = 'variable')) + \
        geom_histogram(data = df_relu_corr_samples[df_relu_corr_samples['variable']=='NN'], \
                        mapping = aes(x = 'V', y = '..density..', fill = 'variable'), 
                        alpha = 0.7, position = 'identity', 
                        bins = 100, color = None) + \
        geom_line( size = 1.5 ) + \
        geom_vline(data = df_rho_inf_wid_vert, mapping = aes(xintercept = 'V', linetype = 'variable'), 
                   size = 1.5, color = '#33a02c' ) + \
        scale_color_manual( values = ['#e41a1c'], 
                       limits = ['SDE (Ours)'] ) + \
        scale_linetype_manual( values = ['dashed'], 
                       limits = ['Infinite Width'] ) + \
        scale_fill_manual( values = ['grey'] ) + \
        scale_x_continuous( limits = [-0.5,0.5] ) + \
        labs(
            x ="Covariance $V^{\\alpha\\beta}_d$", y = "Density", 
            color = '', fill = '', linetype = '') + \
        theme( legend_position = 'bottom', 
              legend_box_spacing = 0.3, legend_box = 'horizontal', 
              legend_background = element_rect(alpha = 0), 
              text = element_text(size = 16) ) 
print(plt_relu_cov_density)
plt_relu_cov_density.save(filename = 'relu_cov_density.pdf', path = 'Figures/' )

# %% [markdown]
# Density Plots for Sigmoid

# %% [code]
S0 = 2**13
n = 150
rho0 = 0.3

# NN 
start_time = time.time()
M_a, M_b, V_ab, quantile_array = simulate_network(n=n, d=n, S0 = S0, rho = rho0, activation='sigmoid')

end_time = time.time()
print('Time Elapsed:', round(end_time - start_time,1), 'seconds.')

# SDE
start_time = time.time() 
p_t, sde_quantile_array = simulate_sde(Nt = n, S0 = S0, rho = rho0, activation='sigmoid') 

end_time = time.time()
print('Time Elapsed:', round(end_time - start_time,1), 'seconds.')

# %% [code]
Ma = p_t[0,:] 
Mb = p_t[1,:] 
V = p_t[2,:] 

rho = V / np.sqrt(Ma * Mb)
rho_nn = V_ab / jnp.sqrt(M_a * M_b)

df = pd.DataFrame( {'V': V, 'rho': rho, 'variable': 'SDE (Ours)'} )
df2 = pd.DataFrame( {'V': V_ab.copy(), 'rho': rho_nn.copy(), 'variable': 'NN'} )
df_sigm_corr_samples = pd.concat([df,df2])

df_sigm_corr_samples['Fisher'] = np.arctanh(df_relu_corr_samples['rho'])

ggplot(df_sigm_corr_samples, aes(x = 'rho', color = 'variable') ) + stat_ecdf() + \
    scale_color_manual( values = ['#e41a1c', '#377eb8'], 
                       breaks = ['SDE (Ours)', 'NN'] ) 

# %% [code]
# fontsize = 25 
# textsize = 30

# # infinite width 
# rho_inf_wid = np.asarray(df_inf_wid_path.rho)[-1]
# df_rho_inf_wid_vert = pd.DataFrame( {'rho': [rho_inf_wid], 'variable': ['Infinite Width']} )

from sklearn.neighbors import KernelDensity
rho = np.asarray(df_sigm_corr_samples.loc[df_sigm_corr_samples['variable'] == 'SDE (Ours)','rho'])
X = np.arctanh(rho).reshape((-1,1))
kde = KernelDensity(kernel='gaussian', bandwidth=0.2).fit(X)

x_vec = np.linspace(-5,5,100)
rho_vec = np.tanh(x_vec)
# rho_vec = np.linspace(-0.99,0.9999,100)
# x_vec = np.arctanh(rho_vec)

jac_vec = 1 / (1 - rho_vec**2) 

log_dens = kde.score_samples(x_vec.reshape((-1,1)))
dens_rho = np.exp( log_dens + np.log(jac_vec) )

# df_density = pd.DataFrame({ 'x': x_vec, 'kde': np.exp(log_dens)})
df_density = pd.DataFrame({ 'rho': rho_vec, 'kde': dens_rho, 'x': x_vec, 'x_density': np.exp(log_dens), 
                           'variable': 'SDE (Ours)'})

#         geom_vline(data = df_rho_inf_wid_vert, mapping = aes(xintercept = 'rho', linetype = 'variable'), 
#                    size = 1.5, color = '#33a02c' ) + \
#         scale_linetype_manual( values = ['dashed'], 
#                        limits = ['Infinite Width'] ) + \

plt_density = ggplot(df_density, aes(x = 'rho', y = 'kde', color = 'variable')) + \
        geom_histogram(data = df_sigm_corr_samples[df_sigm_corr_samples['variable']=='NN'], \
                        mapping = aes(x = 'rho', y = '..density..', fill = 'variable'), 
                        alpha = 0.7, position = 'identity', 
                        bins = 100, color = None) + \
        geom_line( size = 1.5 ) + \
        scale_color_manual( values = ['#e41a1c'], 
                       limits = ['SDE (Ours)'] ) + \
        scale_fill_manual( values = ['grey'] ) + \
        labs(
            x ="Correlation $\\rho^{\\alpha\\beta}_d$", y = "Density", 
            color = '', fill = '', linetype = '') + \
        theme( legend_position = 'bottom', 
              legend_box_spacing = 0.3, legend_box = 'horizontal', 
              legend_background = element_rect(alpha = 0), 
              text = element_text(size = 16) ) 
print(plt_density)
plt_density.save(filename = 'sigm_rho_density.pdf', path = 'Figures/' )

# %% [code]
# fontsize = 25 
# textsize = 30

# # infinite width 
# rho_inf_wid = np.asarray(df_inf_wid_path.rho)[-1]
# df_rho_inf_wid_vert = pd.DataFrame( {'V':[rho_inf_wid / 5], 'rho': [rho_inf_wid], 'variable': ['Infinite Width']} )

from sklearn.neighbors import KernelDensity
cov = np.asarray(df_sigm_corr_samples.loc[df_sigm_corr_samples['variable'] == 'SDE (Ours)','V'])
# X = np.arctanh(rho).reshape((-1,1))
X = cov.reshape((-1,1))
kde = KernelDensity(kernel='gaussian', bandwidth=0.005).fit(X)

x_vec = np.linspace(-0.5,0.5,100)
# rho_vec = np.tanh(x_vec)
# rho_vec = np.linspace(-0.99,0.9999,100)
# x_vec = np.arctanh(rho_vec)

# jac_vec = 1 / (1 - rho_vec**2) 

log_dens = kde.score_samples(x_vec.reshape((-1,1)))
# dens_rho = np.exp( log_dens + np.log(jac_vec) )
dens_V = np.exp( log_dens )

# df_density = pd.DataFrame({ 'x': x_vec, 'kde': np.exp(log_dens)})
df_sigm_cov_density = pd.DataFrame({ 'V': x_vec, 'kde': dens_V, 'variable': 'SDE (Ours)'})

plt_sigm_cov_density = ggplot(df_sigm_cov_density, aes(x = 'V', y = 'kde', color = 'variable')) + \
        geom_histogram(data = df_sigm_corr_samples[df_sigm_corr_samples['variable']=='NN'], \
                        mapping = aes(x = 'V', y = '..density..', fill = 'variable'), 
                        alpha = 0.7, position = 'identity', 
                        bins = 100, color = None) + \
        geom_line( size = 1.5 ) + \
        scale_color_manual( values = ['#e41a1c'], 
                       limits = ['SDE (Ours)'] ) + \
        scale_fill_manual( values = ['grey'] ) + \
        scale_x_continuous( limits = [-0.5,0.5] ) + \
        labs(
            x ="Covariance $V^{\\alpha\\beta}_d$", y = "Density", 
            color = '', fill = '', linetype = '') + \
        theme( legend_position = 'bottom', 
              legend_box_spacing = 0.3, legend_box = 'horizontal', 
              legend_background = element_rect(alpha = 0), 
              text = element_text(size = 16) ) 
print(plt_sigm_cov_density)
plt_sigm_cov_density.save(filename = 'sigm_cov_density.pdf', path = 'Figures/' )

# %% [markdown]
# Plot Paths

# %% [code]
# plot paths 
d = n
df_path = pd.DataFrame( {'t': np.linspace(0,T,d+1), 
#                          'q25': quantile_array[:,0], 
                         'median': quantile_array[:,1], 
#                          'q75': quantile_array[:,2], 
                         'data': 'NN'} )
df_path2 = pd.DataFrame( {'t':np.linspace(0,T,Nt), 
#                           'q25': sde_quantile_array[:,0], 
                          'median': sde_quantile_array[:,1], 
#                           'q75': sde_quantile_array[:,2], 
                          'data': 'SDE (Ours)'} ) 
df_inf_wid_path['data'] = 'Infinite Width'
df_inf_wid_path['median'] = df_inf_wid_path['rho']

df_path = pd.concat( [df_path, df_path2, df_inf_wid_path[['t','median','data']]] )
df_path['1-median'] = 1 - df_path['median']


# %% [code]

#     geom_line( aes(y = 'q25'), linetype='dashed' ) + \
#     geom_line( aes(y = 'q75'), linetype='dashed' ) + \
plt_shaped_path = ggplot(df_path, aes(x='t', y = 'median', color = 'data', linetype = 'data')) + \
    geom_line( size=1.5 ) + \
    scale_color_manual( values = ['#e41a1c', '#377eb8','#33a02c'], 
                       breaks = ['SDE (Ours)', 'NN', 'Infinite Width'] ) + \
    scale_linetype_manual( values = ['solid', 'solid', 'dashed'], 
                        breaks = ['SDE (Ours)', 'NN', 'Infinite Width']
                        ) + \
    labs(
            x ="Time $t$", y = "Median Correlation $\\rho^{\\alpha\\beta}_t$", 
            color = '', fill = '', linetype = '') + \
    theme( legend_position = 'bottom', 
          legend_box_spacing = 0.3, legend_box = 'horizontal', 
          legend_background = element_rect(alpha = 0), 
          text = element_text(size = 16) ) 
print(plt_shaped_path)
plt_shaped_path.save(filename = 'rho_shaped_path.pdf', path = 'Figures/' )

# %% [code]
# 2-sample KS test 

from scipy.stats import ks_2samp
# ks_2samp(V, V_ab.copy())

# for SDE 
S0 = 2**12

start_time = time.time() 
p_t, sde_quantile_array = simulate_sde(Nt = 100, S0 = S0) 
Ma = p_t[0,:]
Mb = p_t[1,:]
V = p_t[2,:]

end_time = time.time()
print('Time Elapsed:', round(end_time - start_time,1), 'seconds.')

S0 = 2**15 # for NNs
n_list = [25,50,75,100]
ks_list = np.zeros((len(n_list),))
p_val_list = np.zeros((len(n_list),))

for i in range(len(n_list)):
    n = n_list[i]
    start_time = time.time()
    M_a, M_b, V_ab, quantile_array = simulate_network(n=n, d=n, S0 = S0)

    end_time = time.time()
    print('n:',n)
    print('Time Elapsed:', round(end_time - start_time,1), 'seconds.')

    ks_list[i] = ks_2samp(V, V_ab.copy())[0]
    p_val_list[i] = ks_2samp(V, V_ab.copy())[1]

df_ks = pd.DataFrame({'n':n_list, 'ks':ks_list, 'p-value':p_val_list})

# %% [code]
fontsize = 16
# textsize = 30

p1_log = np.polyfit(x = np.log( df_ks['n'] ), y = np.log( df_ks['ks'] ), deg = 1)
print(p1_log)
df_ks['fit'] = np.exp( np.log( df_ks['n'] ) * p1_log[0] + p1_log[1] )
n
df_ks_triangle = pd.DataFrame( { 'x': [30, 30, 50], 'y': [0.04, np.sqrt(5/3) * 0.04, 0.04] } )
df_ks_text = pd.DataFrame( { 'x': [38], 'y': [0.038], 'label': ['Slope -1/2'] } )

plt_ks = ggplot(df_ks, aes(x='n', y='ks')) + geom_point( size = 3 ) + \
    geom_line( aes( y='fit' ) ) + \
    geom_polygon(aes( x = 'x', y = 'y' ), data = df_ks_triangle, alpha = 0, color = 'black') + \
    geom_text(aes( x = 'x', y = 'y', label = 'label' ), data = df_ks_text, size = fontsize ) + \
    scale_x_log10() + scale_y_log10() + \
    labs( x = 'Width $n$', y = 'KS-Statistic' ) + \
    theme( figure_size = (5.5,4.75), text = element_text(size = fontsize) ) 
print(plt_ks)
plt_ks.save(filename = 'ks_vs_n.pdf', path = 'Figures/' )

# %% [code]
# unshaped paths 
# infinite width vs. actual network 

S0 = 2**14
n = 150
d = n
rho0 = 0.3
return_paths = 10
p = 0

# NN 
start_time = time.time()
M_a, M_b, V_ab, quantile_array, nn_paths = simulate_network(n=n, d=n, S0 = S0, rho = rho0, p=p, 
                                                            return_paths=return_paths)

end_time = time.time()
print('Time Elapsed:', round(end_time - start_time,1), 'seconds.')

# %% [code]
# Infinite Width
# K1 != nu for ReLU 

T = d/n 
c = 2

K1 = lambda rho: ( np.sqrt(1-rho**2) + (np.pi - np.arccos(rho))*rho ) / (2*np.pi)
t_vec = np.linspace(0,T,d+1)
rho_vec = np.zeros((d+1,))
rho_vec[0] = rho0

for i in range(d):
    rho_vec[i+1] = c * K1(rho_vec[i]) # recursion without time step

# calc conjectured lower bound without recursion 

l_vec = np.linspace(0,d,d+1) 
rho_lb_vec = 1 - (1 - rho0) / ( 1 + np.sqrt(2 * (1-rho0)) * l_vec / (3*np.pi) )**2

# %% [code]
# Markov Chain 
import numpy.random as rd 

S0 = 2**13
c = 2

K1 = lambda rho: ( np.sqrt(1-rho**2) + (np.pi - np.arccos(rho))*rho ) / (2*np.pi)
K2 = lambda rho: ( 3*rho*np.sqrt(1-rho**2) + (np.pi - np.arccos(rho)) * (1 + 2 * rho**2) ) / (2 * np.pi) 
K31 = lambda rho: ( np.sqrt(1-rho**2) * (2 + rho**2) + 3*( np.pi - np.arccos(rho) ) * rho ) / (2*np.pi) 
M2 = 5 

mu = lambda rho: c/4 * ( K1(rho) * ( c**2 * K2(rho) + 3*M2 + 3 ) - 4*c*K31(rho) ) 
sigma2 = lambda rho: c**2/2 * ( K1(rho)**2 * ( c**2*K2(rho) + M2 + 1 ) - 4*c*K1(rho)*K31(rho) + 2*K2(rho) ) 

t_vec = np.linspace(0,T,d+1)
rho_vec2 = np.zeros((d+1,S0))
rho_vec2[0,:] = rho0

for i in range(d):
    g = rd.normal(size = (S0,))
    # recursion without time step
    rho_vec2[i+1,:] = c * K1(rho_vec2[i,:]) + mu(rho_vec2[i,:]) / n + \
                        np.sqrt( np.abs(sigma2(rho_vec2[i,:])) ) * g / np.sqrt(n) 
    ind = rho_vec2[i+1,:] > 1
    rho_vec2[i+1,ind] = 1 - (rho_vec2[i+1,ind] - 1) # reflecting boundary 
#     rho_vec2[i+1,ind] = 1 # absorbing boundary 

rho_vec2_median = np.median(rho_vec2,axis=1)

# %% [code]
df_unshaped_path = pd.DataFrame( {'l':l_vec, 
                                  'NN': 1-quantile_array[:,1], 
                                  'Infinite Width':1-rho_vec, 
#                                   'Bound': 1-rho_lb_vec, 
                                  'Markov Chain (Ours)': 1 - rho_vec2_median} )
df_unshaped_path = pd.melt(df_unshaped_path, id_vars = 'l')
# df_unshaped_path


# %% [code]

plt_unshaped_path = ggplot(df_unshaped_path, 
                           aes( x='l', y='value', color='variable', linetype = 'variable')) + \
    geom_line( size=1.5 ) + \
    scale_y_log10() + \
    scale_color_manual( values = ['#e41a1c', '#377eb8','#33a02c', '#ff7f00'], 
                       breaks = ['Markov Chain (Ours)', 'NN', 'Infinite Width', 'Bound'] ) + \
    scale_linetype_manual( values = ['solid', 'solid', 'dashed', 'dashed'], 
                        breaks = ['Markov Chain (Ours)', 'NN', 'Infinite Width', 'Bound']
                        ) + \
    labs(
            x ="Layer $\\ell$", y = "Median (1-Correlation) $1-\\rho^{\\alpha\\beta}_\ell$", 
            color = '', fill = '', linetype = '') + \
    theme( legend_position = 'bottom', 
          legend_box_spacing = 0.3, legend_box = 'horizontal', 
          legend_background = element_rect(alpha = 0), 
          text = element_text(size = 16) ) 

print(plt_unshaped_path)
plt_unshaped_path.save(filename = 'unshaped_path.pdf', path = 'Figures/' )

# %% [code]
# fontsize = 25 
# textsize = 30

# infinite width 
rho_inf_wid = rho_vec[-1]
df_rho_inf_wid_vert = pd.DataFrame( {'rho': [rho_inf_wid], '1-rho': [1-rho_inf_wid], 
                                     'log(1-rho)': [np.log(1-rho_inf_wid)], 
                                     'variable': ['Infinite Width']} )

from sklearn.neighbors import KernelDensity
rho = rho_vec2[-1,:]
X = np.log(1-rho).reshape((-1,1))
kde = KernelDensity(kernel='gaussian', bandwidth=0.3).fit(X)

x_vec = np.linspace(-15, -3, 100)
rho_vec = 1 - np.exp(x_vec)
# rho_vec = np.linspace(-0.99,0.9999,100)
# x_vec = np.arctanh(rho_vec)

# jac_vec = 1 / (1 - rho_vec**2)
# jac_vec2 = (1 - rho_vec) * 2

log_dens = kde.score_samples(x_vec.reshape((-1,1)))
dens_rho = np.exp( log_dens ) 

# df_density = pd.DataFrame({ 'x': x_vec, 'kde': np.exp(log_dens)})
df_density2 = pd.DataFrame({ 'rho': rho_vec, 'kde': dens_rho, 'x': x_vec, 'x_density': np.exp(log_dens), 
                           'variable': 'Markov Chain (Ours)'})
df_density2['1-rho'] = 1 - df_density2['rho']
df_density2['log(1-rho)'] = np.log(1 - df_density2['rho'])

df_relu_corr_NN = pd.DataFrame({ 'rho': V_ab / np.sqrt(M_a * M_b), 'variable': 'NN' })
df_relu_corr_NN['1-rho'] = 1 - df_relu_corr_NN['rho'] 
df_relu_corr_NN['log(1-rho)'] = np.log(1 - df_relu_corr_NN['rho'] )

plt_density2 = ggplot(df_density2, aes(x = 'log(1-rho)', y = 'kde', color = 'variable')) + \
        geom_histogram(data = df_relu_corr_NN, \
                        mapping = aes(x = 'log(1-rho)', y = '..density..', fill = 'variable'), 
                        alpha = 0.7, position = 'identity', 
                        bins = 100, color = None) + \
        geom_line( size = 1.5 ) + \
        geom_vline(data = df_rho_inf_wid_vert, mapping = aes(xintercept = 'log(1-rho)', linetype = 'variable'), 
                   size = 1.5, color = '#33a02c' ) + \
        scale_color_manual( values = ['#e41a1c'], 
                           limits = ['Markov Chain (Ours)'] ) + \
        scale_linetype_manual( values = ['dashed'], limits = ['Infinite Width'] ) + \
        scale_fill_manual( values = ['grey'] ) + \
        labs(
            x ="log(1-Correlation) $\\log(1-\\rho^{\\alpha\\beta}_d)$", y = "Density", 
            color = '', fill = '', linetype = '') + \
        theme( legend_position = 'bottom', 
              legend_box_spacing = 0.3, legend_box = 'horizontal', 
              legend_background = element_rect(alpha = 0), 
              text = element_text(size = 16) ) 
print(plt_density2)
plt_density2.save(filename = 'rho_density_unshaped.pdf', path = 'Figures/' )


# %% [code]
# blowup paths 
# infinite width vs. actual network paths vs. stable network paths

S0 = 2**10
n = 100
d = n
rho0 = 0.3
return_paths = 10
p = 0

# NN 
start_time = time.time()
M_a, M_b, V_ab, quantile_array, nn_paths = simulate_network(n=n, d=n, S0 = S0, rho = rho0, p=p, 
                                                            n_in = 1, 
                                                            return_paths=return_paths, 
                                                            activation='softplus')

end_time = time.time()
print('Time Elapsed:', round(end_time - start_time,1), 'seconds.')

# SDE
start_time = time.time() 
p_t, sde_quantile_array = simulate_sde(Nt = n, S0 = S0, rho = rho0, activation='softplus') 

end_time = time.time()
print('Time Elapsed:', round(end_time - start_time,1), 'seconds.')

# %% [code]
l_vec = np.linspace(0,d,d+1)

plt_blow_up = ggplot(aes(x = l_vec, y = nn_paths[:,0,5])) + geom_line( color = 'grey' ) + \
    geom_line( aes(y = nn_paths[:,0,0]), color = 'grey' ) + \
    geom_line( aes(y = nn_paths[:,0,1]), color = 'grey' ) + \
    geom_line( aes(y = nn_paths[:,0,2]), color = 'grey' ) + \
    geom_line( aes(y = nn_paths[:,0,3]), color = 'grey' ) + \
    geom_line( aes(y = nn_paths[:,0,4]), color = 'grey' ) + \
    geom_line( aes(y = nn_paths[:,0,5]), color = 'grey' ) + \
    geom_line( aes(y = nn_paths[:,0,6]), color = 'grey' ) + \
    geom_line( aes(y = nn_paths[:,0,7]), color = 'grey' ) + \
    geom_line( aes(y = nn_paths[:,0,8]), color = 'grey' ) + \
    geom_line( aes(y = nn_paths[:,0,9]), color = 'grey' ) + \
    scale_y_log10() + \
    labs(
            x ="Layer $\\ell$", y = "Magnitude Sample Paths $V^{\\alpha\\alpha}_\ell$", 
            color = '', fill = '') + \
        theme( text = element_text(size = 16) ) 

print(plt_blow_up)
plt_blow_up.save(filename = 'blow_up_paths.pdf', path = 'Figures/' )

# %% [code]
Ma = p_t[0,:] 
Mb = p_t[1,:] 
V = p_t[2,:] 

rho = V / np.sqrt(Ma * Mb)
rho_nn = V_ab / jnp.sqrt(M_a * M_b)

df = pd.DataFrame( {'V': V, 'rho': rho, 'Vaa': Ma, 'variable': 'SDE'} )
df2 = pd.DataFrame( {'V': V_ab.copy(), 'rho': rho_nn.copy(), 'Vaa': M_a.copy(), 'variable': 'NN'} )
df_relu_corr_samples = pd.concat([df,df2])

df_relu_corr_samples['Fisher'] = np.arctanh(df_relu_corr_samples['rho'])

ggplot(df_relu_corr_samples, aes(x = 'Vaa', color = 'variable') ) + stat_ecdf() + \
    scale_color_manual( values = ['#e41a1c', '#377eb8'], 
                       breaks = ['SDE', 'NN'] ) + \
    scale_x_log10() 

# %% [code]
# blowup paths 
# infinite width vs. actual network paths vs. stable network paths

S0 = 2**10
n = 100
d = n
rho0 = 0.3
return_paths = 10
p = 0

# NN 
start_time = time.time()
M_a, M_b, V_ab, quantile_array, nn_paths = simulate_network(n=n, d=n, S0 = S0, rho = rho0, p=p, 
                                                            n_in = 1, 
                                                            return_paths=return_paths, 
                                                            activation='softplus_log2')

end_time = time.time()
print('Time Elapsed:', round(end_time - start_time,1), 'seconds.')

# SDE
start_time = time.time() 
p_t, sde_quantile_array = simulate_sde(Nt = n, S0 = S0, rho = rho0, activation='softplus') 

end_time = time.time()
print('Time Elapsed:', round(end_time - start_time,1), 'seconds.')

# %% [code]
l_vec = np.linspace(0,d,d+1)

plt_stable = ggplot(aes(x = l_vec, y = nn_paths[:,0,5])) + geom_line( color = 'grey' ) + \
    geom_line( aes(y = nn_paths[:,0,0]), color = 'grey' ) + \
    geom_line( aes(y = nn_paths[:,0,1]), color = 'grey' ) + \
    geom_line( aes(y = nn_paths[:,0,2]), color = 'grey' ) + \
    geom_line( aes(y = nn_paths[:,0,3]), color = 'grey' ) + \
    geom_line( aes(y = nn_paths[:,0,4]), color = 'grey' ) + \
    geom_line( aes(y = nn_paths[:,0,5]), color = 'grey' ) + \
    geom_line( aes(y = nn_paths[:,0,6]), color = 'grey' ) + \
    geom_line( aes(y = nn_paths[:,0,7]), color = 'grey' ) + \
    geom_line( aes(y = nn_paths[:,0,8]), color = 'grey' ) + \
    geom_line( aes(y = nn_paths[:,0,9]), color = 'grey' ) + \
    scale_y_log10() + \
    labs(
            x ="Layer $\\ell$", 
            y = "Magnitude Sample Paths $V^{\\alpha\\alpha}_\ell$", 
            color = '', fill = '') + \
        theme( text = element_text(size = 16) ) 

print(plt_stable)
plt_stable.save(filename = 'stable_paths.pdf', path = 'Figures/' )

# %% [code]
simulate_sde

# %% [code]
# heat map plot vs parameters 

# for SDE 
S0 = 2**12
cm = -1
n = 150
d = n
Nt = d
rho0 = 0.3
T = d/n
dt = T/Nt

df_tuning = pd.DataFrame( {'t': np.linspace(0,d/n,Nt)} )
df_tuning_nn = pd.DataFrame( {'t': np.linspace(0,d/n,d)} ) # note length difference 
df_tuning_inf_wid = pd.DataFrame( {'t': np.linspace(0,d/n,Nt) } )

for cm in [-0.2, -1, -5]:
    start_time = time.time() 
    p_t, sde_quantile_array = simulate_sde(n = d, d = d, Nt = Nt, S0 = S0, quantiles = [0.25,0.5,0.75], cm = cm) 
    df_tuning['$c_- = $' + str(cm)] = sde_quantile_array[:,1]
    
#     if cm >= -1:
    M_a, M_b, V_ab, quantile_array = simulate_network(n=n, d=n, S0 = S0, cm = cm)
    df_tuning_nn['$c_- = $' + str(cm)] = quantile_array[1:,1] 

#     t_vec = np.linspace(0,T,Nt+1)
    rho_vec = np.zeros((Nt+1,))
    rho_vec[0] = rho0

    for i in range(Nt):
        rho_vec[i+1] = rho_vec[i] + nu(rho_vec[i],cp,cm) * dt 
    
    df_tuning_inf_wid['$c_- = $' + str(cm)] = rho_vec[1:]
    
    end_time = time.time()
    print('Time Elapsed:', round(end_time - start_time,1), 'seconds.')


# %% [code]
df_tuning_melt = pd.melt(df_tuning, id_vars = 't') 
df_tuning_melt['data'] = 'SDE (Ours)'

df_tuning_nn_melt = pd.melt(df_tuning_nn, id_vars = 't')
df_tuning_nn_melt['data'] = 'NN'

df_tuning_inf_wid_melt = pd.melt(df_tuning_inf_wid, id_vars = 't')
df_tuning_inf_wid_melt['data'] = 'Infinite Width'

df_tuning_melt = pd.concat( [df_tuning_melt, df_tuning_inf_wid_melt] )

# %% [code]

# df_tuning_melt['variable'] = df_tuning_melt['variable'].cat.reorder_categories(df_tuning.columns[1:].tolist())

plt_tuning = ggplot(df_tuning_melt, aes(x = 't', y = 'value', color = 'data', linetype = 'data')) + \
    geom_line(size = 1.5) + \
    facet_wrap( 'variable', nrow = 1 ) + \
    scale_color_manual( values = ['#e41a1c', '#377eb8', '#33a02c'], 
                      breaks = ['SDE (Ours)', 'NN', 'Infinite Width'] ) + \
    scale_linetype_manual( values = ['solid', 'solid', 'dashed'], 
                          breaks = ['SDE (Ours)', 'NN', 'Infinite Width'] ) + \
    labs(
            x ="Time $t$", 
            y = "Median Correlation $\\rho^{\\alpha\\beta}_t$", 
            color = '', fill = '', linetype = '') + \
    theme( figure_size = (16,4), text = element_text(size = 16), 
          legend_position = 'bottom', legend_box = 'horizontal', 
          legend_box_spacing = 0.3, 
          subplots_adjust = {'wspace':0.15}) 
print(plt_tuning)
plt_tuning.save(filename = 'tuning.pdf', path = 'Figures/' )

# %% [code]
